# Supplementary material
Source: publisher figshare collection journal article supplement (https://aacr.figshare.com/articles/dataset/_/22490227)

# CDCP1

TCGA Cell 2017 data

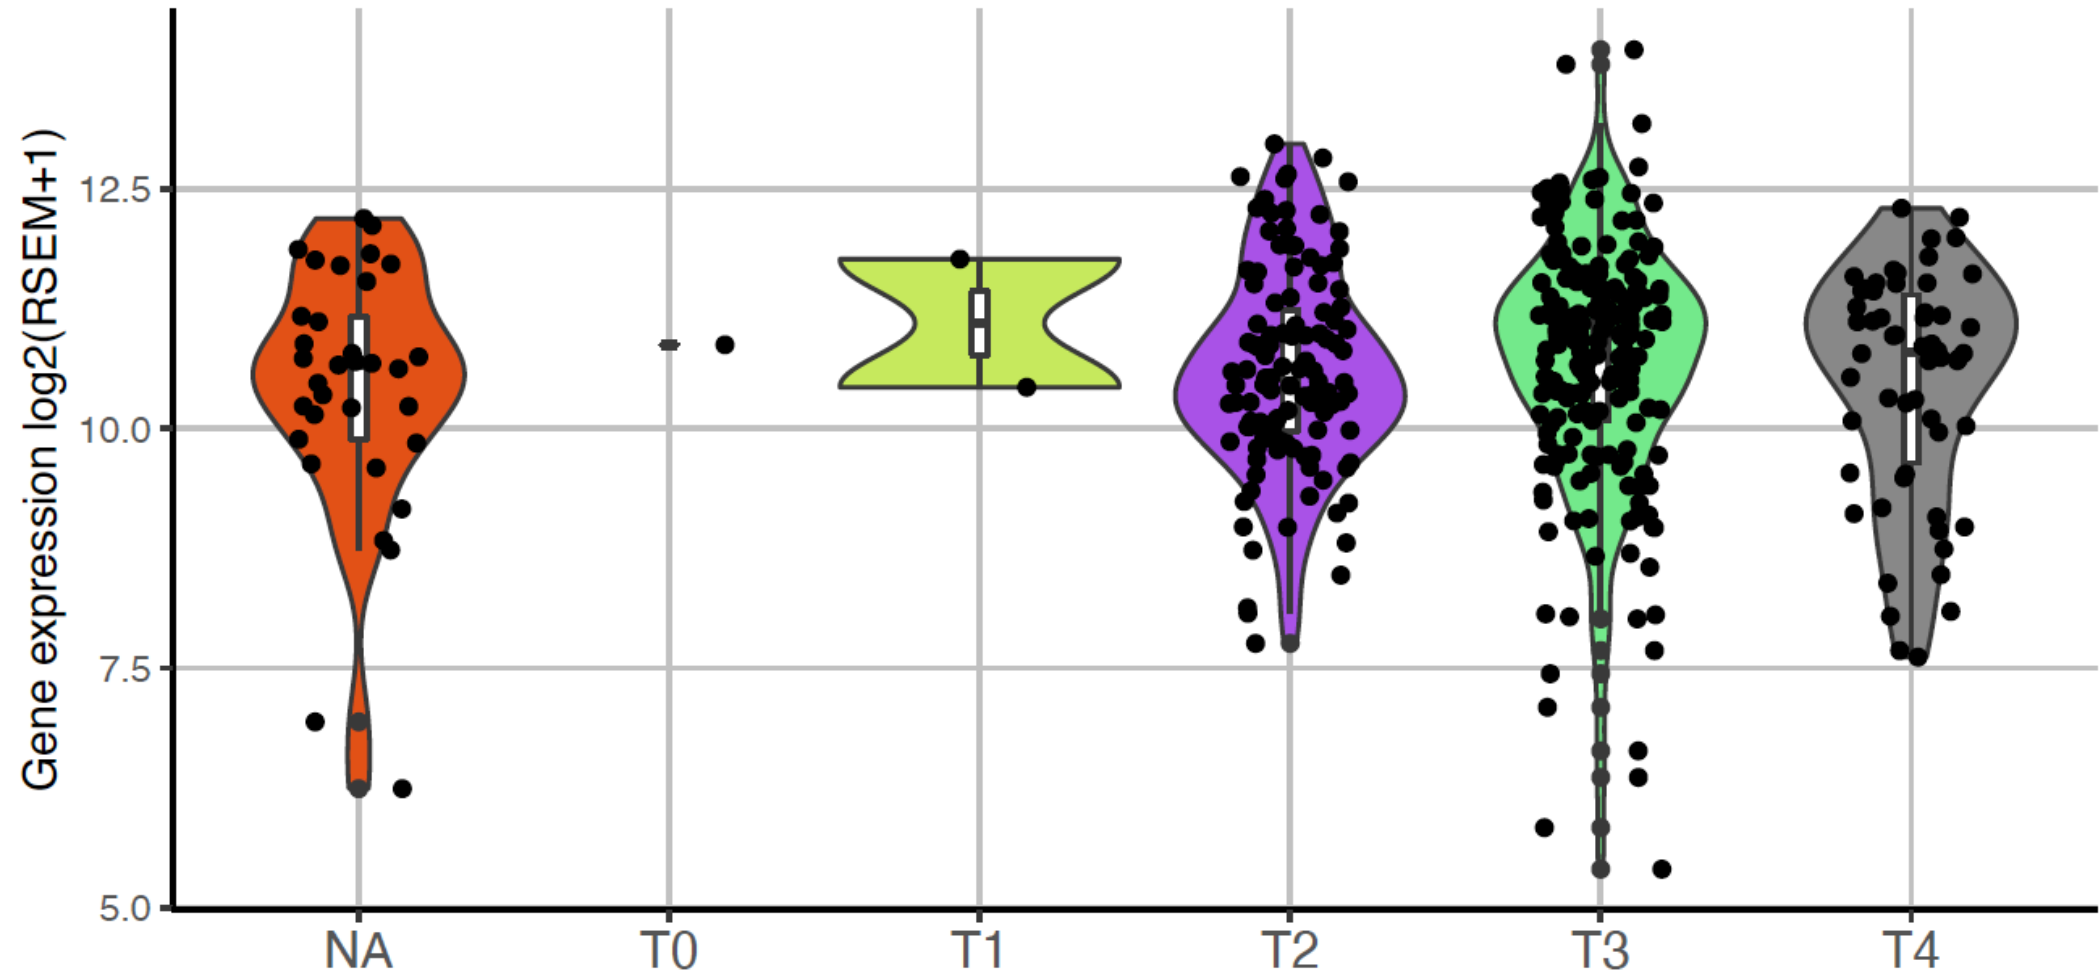

Supplement: Supplementary file 1 [file 39941857]
